# Supplementary material for: Microparticle-enhanced production of ε-poly-l-lysine in fed-batch fermentation
Source: Royal Society of Chemistry journal article supplement (doi:10.1039/c5ra14319e), 2015-01-01
Supplement: c5ra14319e1.pdf [file c5ra14319e1.pdf]

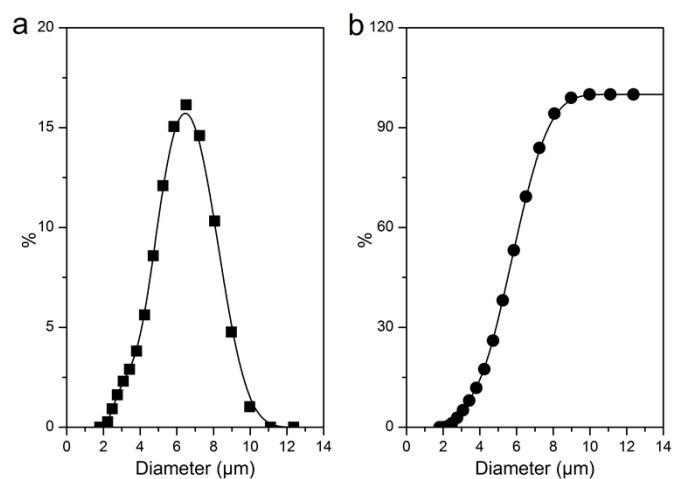

**Fig. S1** The size distribution of the talc microparticles. Percentage of talc microparticles amount (a), Percentage of talc microparticles accumulated amount (b).
