# Supplementary material for: Microparticle-enhanced production of ε-poly-l-lysine in fed-batch fermentation
Source: Royal Society of Chemistry journal article supplement (doi:10.1039/c5ra14319e), 2015-01-01
Supplement: c5ra14319e2.pdf [file c5ra14319e2.pdf]

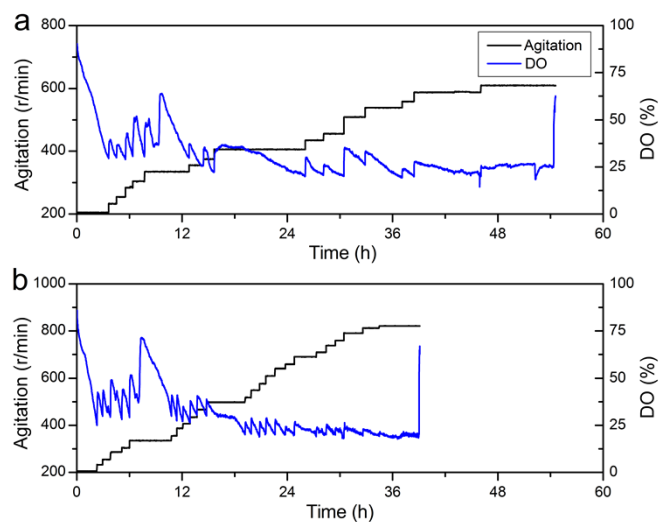

**Fig. S2** Time courses of agitation speed and DO concentration in batch fermentations for  $\epsilon$ -PL production by *Streptomyces* sp. M-Z18 without (a) and with (b) talc microparticles (6  $\mu$ m, 10 g/L).
